# Supplementary material for: Characterization of the First “Candidatus Nitrotoga” Isolate Reveals Metabolic Versatility and Separate Evolution of Widespread Nitrite-Oxidizing Bacteria
Source: PubMed Central journal article supplement (PMC6050957; doi:10.1128/mbio.01186-18), 2018-07-10
Supplement: mbo004183968s1.pdf [file mbo004183968s1.pdf]

## 1 **Supplemental Text S1: Supplemental materials and methods**

### 2 **Electron microscopy**

3 Scanning electron microscopy was performed as described previously (1) with the following  
4 modifications. Sterile poly-L-lysine coated slides were submerged in an actively growing  
5 “*Ca. N. fabula*” culture for 3 days before fixation of attached cells. All fixatives were diluted  
6 in, and all washing steps were performed with, cacodylate buffer (25 mM sodium cacodylate,  
7 0.7 mM MgCl<sub>2</sub>, pH 7.0) mimicking medium osmolarity. For transmission electron  
8 microscopy following chemical fixation, 300 ml of a late exponential phase “*Ca. N. fabula*”  
9 culture was fixed by adding glutaraldehyde (2.5% vol/vol final concentration) and harvested  
10 by centrifugation (9,000×g, 15 min). Cells were embedded in 1% (wt/vol) plaque agarose  
11 (Biozym) in cacodylate buffer, cut into 1 mm-sized blocks and post-fixed with a 1% (wt/vol)  
12 OsO<sub>4</sub> solution in cacodylate buffer for 1 h. Fixed cells were washed three times in cacodylate  
13 buffer, dehydrated in 30 to 100% (vol/vol) ethanol, washed twice in propylene oxide, and  
14 infiltrated with increasing concentrations of low viscosity resin in propylene oxide. For  
15 polymerization, the resin blocks were incubated at 60°C for one week. Ultra-thin sections  
16 (70 nm) were cut from the resin blocks (Ultracut S, Leica) with a glass knife. Sections were  
17 placed on copper grid mesh holders and post-stained with gadolinium triacetate and lead  
18 citrate before visualization with a Libra120 transmission electron microscope (Zeiss). For  
19 transmission electron microscopy following high pressure freezing, concentrated live culture  
20 was mixed with 2% agarose in a 3 mm aluminum sample holder and immediately high-  
21 pressure frozen with an HPM 100 (Leica). Samples were transferred onto frozen acetone  
22 containing 1% (wt/vol) OsO<sub>4</sub> and processed using the super quick freeze-substitution method  
23 (2). After reaching room temperature, the samples were washed three times with acetone and  
24 two times with ethanol, and were infiltrated sequentially using centrifugation (3) in 2 ml tubes

25 with 25, 50, 75 and 2× 100% LR-White resin (Agar Scientific). The samples were placed on  
26 top of the resin and centrifuged for 30 s at 2,000×g in each step. After the second pure resin  
27 step, samples were transferred into fresh resin in gelatin capsules and polymerized at 60°C for  
28 1 h (4). Ultra-thin (70 nm) sections were cut with an Ultracut UC7 (Leica) and mounted on  
29 formvar coated slot grids (Agar Scientific). Sections were contrasted with 0.5% aqueous  
30 uranyl acetate (Science Services) for 20 min and with 2% Reynold's lead citrate for 6 min  
31 before imaging with a Quanta FEG 250 scanning electron microscope (FEI) equipped with a  
32 STEM detector.

33

#### 34 **Nitrite oxidation kinetic measurements**

35 Nitrite oxidation kinetics of “*Ca. N. fabula*” were inferred from instantaneous oxygen uptake  
36 measurements in four independent experiments as previously described (5). Biomass of “*Ca.*  
37 *N. fabula*” was sampled upon substrate depletion (early stationary phase), which was  
38 predictable to 2-3 hours. Oxygen uptake measurements were done using a microrespiration  
39 (MR) system submerged in a recirculating water bath (28°C) (6, 7). All measurements were  
40 performed utilizing 2 ml glass MR chambers equipped with an MR injection lid, a glass  
41 coated stir bar, a PA 2000 picoammeter, and an OX-MR oxygen microsensor with a 500 µm  
42 tip diameter (Unisense). Before the experiments, the OX-MR microsensor was polarized  
43 continuously for at least one week (6, 7). Culture biomass, either concentrated (10× by  
44 centrifugation at 6000×g, 5 min, 20°C) or un-concentrated, was incubated for a minimum of  
45 30 min in the recirculating water bath before transfer to an MR chamber. MR chambers with  
46 glass coated stir bars were filled headspace-free with “*Ca. N. fabula*” culture. Once immersed  
47 in the recirculating water bath, stirring (350 r.p.m.) was started. The OX-MR microsensor was  
48 inserted into the MR chamber and equilibrated (1 to 2 h). Stable sensor signal drift was

49 measured for at least 10 min prior the initial injection of nitrite using Hamilton syringes.  
50 Multiple nitrite injection oxygen uptake measurement traces were performed. Nitrite additions  
51 started from low concentrations and moved toward high concentrations (the injections led to  
52 different start concentrations of nitrite in the MR chambers). Once the nitrite oxidation rate  
53 was stable for 2-5 minutes, another injection was performed. The rate of oxygen uptake was  
54 measured after each individual injection of nitrite (5). The endogenous rate of oxygen  
55 consumption was subtracted from the measured rates at the different nitrite concentrations.  
56 Dissolved oxygen (DO) was not a limiting factor in the experiments. The DO concentration in  
57 the MR chambers was 200-220  $\mu\text{M}$  at the beginning and 15-160  $\mu\text{M}$  at the end of the  
58 experiments. After the experiments, MR chamber contents were immediately frozen for  
59 chemical and protein analysis. Nitrite and nitrate concentrations were measured to confirm the  
60 total injected nitrite concentration and oxidation to nitrate. Total protein content per MR  
61 chamber was determined using the Pierce bicinchoninic acid (BCA) Protein Assay Kit  
62 (Thermo Scientific) “Enhanced Test-tube Procedure” after cell lysis (Bacterial Protein  
63 Extraction Reagent, Thermo Scientific).

64 The kinetic constants  $K_{m(\text{app})}$  and  $V_{\text{max}}$  of “*Ca. N. fabula*” were estimated from multiple nitrite  
65 injection oxygen uptake measurements. Nitrite uptake rates were calculated from the  
66 measured oxygen uptake rates, according to a nitrite to oxygen uptake stoichiometry of 2:1 for  
67 NOB. Michaelis-Menten plots of nitrite uptake rates versus nitrite concentration were  
68 obtained by fitting a Michaelis-Menten model to the data. A nonlinear least squares regression  
69 analysis was used to estimate both  $K_{m(\text{app})}$  and  $V_{\text{max}}$  of “*Ca. N. fabula*” (8).

70

## 71 “*Ca. N. fabula*” genome sequencing and assembly

72 Illumina sequencing libraries were prepared using the Nextera DNA library prep kit (Illumina

73 Inc.) following the manufacturer's recommendations and paired-end sequenced (2×300 bp) on  
74 a MiSeq using a MiSeq Reagent kit v3 (Illumina) following the manufacturer's  
75 recommendations. In addition, Nanopore library preparation was done using the Nanopore  
76 sequencing kit (SQK-MAP006, Oxford Nanopore), following the manufacturers  
77 recommendations (v. MN006\_1124\_revF\_14Aug2015). The library was sequenced using the  
78 MinION Mk1 device (Oxford Nanopore) with the MinKnow software (v. 0.50.2.15). Base  
79 calling was carried out using Metrichor and the 2D base calling workflow (Rev. 1.62).  
80 Illumina read quality and adaptor trimming (trim limit: 0.01, no ambiguous bases, min length:  
81 55 bp), *de novo* assembly (word size: 21, bubble size: 186, min length: 500 bp), and read  
82 mapping (default settings except length fraction: 0.95 and similarity fraction: 0.95) were  
83 performed in CLC Genomics Workbench v. 8.5.1. The Illumina *de novo* assembly was  
84 checked for contamination and completeness using the mmgenome workflow  
85 (<http://madsalbertsen.github.io/mmgenome/>). Afterwards, the Illumina *de novo* assembly was  
86 manually scaffolded with nanopore data (mapping reads to scaffolds ends). Gaps were  
87 polished by recruiting Illumina reads mapping to the nanopore reads and performing local gap  
88 reassembly with the Illumina reads (read mapping and *de novo* assembly settings were the  
89 same as above except read similarity fraction: 0.85).

90

## 91 **Enrichment and metagenomic analysis of thermophilic nitrifiers**

92 Biofilm was sampled from a hot spring (77°C, pH ~6) in Grændalur valley, Iceland (N 64° 2'  
93 0" W 21°11'43"). To enrich nitrifying organisms, approximately 0.1 g of the biofilm sample  
94 was added to 40 ml sterile mineral medium, which had been prepared according to Koch *et al.*  
95 (9). The medium was modified by the addition of 3 µM Na<sub>2</sub>WO<sub>4</sub>×2H<sub>2</sub>O (instead of Na<sub>2</sub>MoO<sub>4</sub>,  
96 which was not added), 3.4 nM Na<sub>2</sub>SeO<sub>3</sub>×5H<sub>2</sub>O, and 0.5 mM filter-sterilized NH<sub>4</sub>Cl. The

97 culture was incubated at 75°C and without agitation in 100 ml glass bottles in darkness. The  
98 ammonium, nitrite, and nitrate content was checked weekly by using Nessler's reagent  
99 (Sigma–Aldrich) and nitrite/nitrate test stripes (Merckoquant, Merck). Ammonium (0.5 mM  
100 NH<sub>4</sub>Cl) was replenished when completely consumed. The pH was monitored with pH test  
101 stripes (Macherey-Nagel) and kept between 6 and 7 by titration with NaHCO<sub>3</sub>. Aliquots of the  
102 ammonia- and nitrite-oxidizing enrichment were transferred into bottles containing fresh  
103 medium when 5 to 8 mM of ammonium had been consumed. By this approach, several sub-  
104 cultures were established from the same primary enrichment.

105 For the extraction of genomic DNA, biomass from several bottles was pooled, collected by  
106 centrifugation (4,500×g, 20 min, 20°C), and stored at -20°C until further processing. The  
107 biomass was then freeze-thawed three times before total nucleic acids were extracted by bead  
108 beating for 40 s with speed setting 6.0 in the presence of phosphate buffer, 10% (w/v) SDS,  
109 and phenol as described elsewhere (10). Between the addition of phosphate buffer and the  
110 addition of SDS and phenol, a 30 min incubation with 2 µl of proteinase K (10 mg/ml) at  
111 37°C and shaking (200 r.p.m.) was added. In total 41.34 ng of DNA was sheared by  
112 ultrasonication for 40 s, using Covaris SonoLite v. 2.07.

113 Sequencing was performed at the next generation sequencing unit of the Vienna Biocenter  
114 Core Facilities ([www.vbcf.ac.at](http://www.vbcf.ac.at)) using an Illumina HiSeq 2500 instrument to generate paired-  
115 end (2×125 bp) reads. Paired end reads were 3' end-trimmed using a q-score of 15 and  
116 minimum length of 50 nucleotides. Quality-trimmed reads were assembled using Metaspades  
117 v. 3.11.1 (11). Assembly coverage was determined by mapping quality-trimmed reads with  
118 bwa v. 0.7.16a (12). Metabat v. 2.12.1 (13) was used to bin metagenome-assembled genomes  
119 (MAGs) using tetranucleotide frequency and coverage. CheckM v. 1.0.7 (14) was used to  
120 assess MAG completeness and contamination. MAGs were automatically annotated by using  
121 an in-house modified version of prokka (15), which uses a local copy of the NCBI non-

122 redundant protein database (NCBI nr) for blast searches and reports for each predicted gene  
123 product the best blast hit, sequence identity to this hit, and query and subject alignment  
124 coverage values.

125

## 126 **Annotation of *nxr* genes**

127 The *nxr* genes of “*Ca. N. fabula*”, and the putative *nxr* genes of the *Desulfurococcaceae*-  
128 related crenarchaeon, were identified (i) by screening the automated annotations for predicted  
129 *nxr/nar*-like genes, and (ii) by blast searching the genomic datasets for members of the type II  
130 DMSO reductase family with similarity to known NXR and NAR alpha, beta, and gamma  
131 subunits. Phylogenetic analysis (Fig. 6 in the main text) confirmed the affiliation of the  
132 predicted alpha subunits with (putative) NARs of nitrate-reducing organisms. In the case of  
133 “*Ca. N. fabula*”, a detailed sequence comparison to the validated NXR of *Nitrospira defluvii*  
134 confirmed the presence of the conserved, cofactor-binding residues in the alpha and beta  
135 subunits (see main text). The identified *nxr/nar*-like genes were annotated as *nxr* (“*Ca. N.*  
136 *fabula*”) or putative *nxr* (*Desulfurococcaceae*-related crenarchaeon) based on the nitrite-  
137 oxidizing phenotype of the “*Ca. N. fabula*” isolate and of the nitrifying thermophilic  
138 enrichment culture, respectively.

139

## 140 **References for Text S1**

- 141 1. Daebeler A, Herbold CW, Vierheilig J, Sedlacek CJ, Pjevac P, Albertsen M,  
142 Kirkegaard RH, de la Torre JR, Daims H, Wagner M. 2018. Cultivation and genomic  
143 analysis of "*Candidatus Nitrosocaldus islandicus*," an obligately thermophilic,  
144 ammonia-oxidizing Thaumarchaeon from a hot spring biofilm in Graendalur Valley,

- 145 Iceland. *Front Microbiol* 9:193.
- 146 2. McDonald KL, Webb RI. 2011. Freeze substitution in 3 hours or less. *J Microsc*  
147 243:227-233.
- 148 3. McDonald KL. 2014. Rapid embedding methods into epoxy and LR White resins for  
149 morphological and immunological analysis of cryofixed biological specimens.  
150 *Microsc Microanal* 20:152-163.
- 151 4. Bowling AJ, Vaughn KC. 2008. A simple technique to minimize heat damage to  
152 specimens during thermal polymerization of LR White in plastic and gelatin capsules.  
153 *J Microsc* 231:186-189.
- 154 5. Kits KD, Sedlacek CJ, Lebedeva EV, Han P, Bulaev A, Pjevac P, Daebeler A,  
155 Romano S, Albertsen M, Stein LY, Daims H, Wagner M. 2017. Kinetic analysis of a  
156 complete nitrifier reveals an oligotrophic lifestyle. *Nature* 549:269-272.
- 157 6. Martens-Habbena W, Berube PM, Urakawa H, de la Torre JR, Stahl DA. 2009.  
158 Ammonia oxidation kinetics determine niche separation of nitrifying *Archaea* and  
159 *Bacteria*. *Nature* 461:976-979.
- 160 7. Martens-Habbena W, Stahl DA. 2011. Nitrogen metabolism and kinetics of ammonia-  
161 oxidizing archaea, p 465-487. *In* Klotz MG, Stein LY (ed), *Methods Enzymol*, vol  
162 496. Elsevier Academic Press, San Diego.
- 163 8. Kemmer G, Keller S. 2010. Nonlinear least-squares data fitting in Excel spreadsheets.  
164 *Nat Protoc* 5:267-281.
- 165 9. Koch H, Lückner S, Albertsen M, Kitzinger K, Herbold C, Spieck E, Nielsen PH,  
166 Wagner M, Daims H. 2015. Expanded metabolic versatility of ubiquitous nitrite-  
167 oxidizing bacteria from the genus *Nitrospira*. *Proc Natl Acad Sci U S A* 112:11371-  
168 11376.
- 169 10. Angel R, Claus P, Conrad R. 2012. Methanogenic archaea are globally ubiquitous in  
170 aerated soils and become active under wet anoxic conditions. *ISME J* 6:847-862.
- 171 11. Nurk S, Meleshko D, Korobeynikov A, Pevzner PA. 2017. metaSPAdes: a new  
172 versatile metagenomic assembler. *Genome Res* 27:824-834.
- 173 12. Li H, Durbin R. 2009. Fast and accurate short read alignment with Burrows-Wheeler

174 transform. *Bioinformatics* 25:1754-1760.

175 13. Kang DWD, Froula J, Egan R, Wang Z. 2015. MetaBAT, an efficient tool for  
176 accurately reconstructing single genomes from complex microbial communities. *PeerJ*  
177 3:e1165.

178 14. Parks DH, Imelfort M, Skennerton CT, Hugenholtz P, Tyson GW. 2015. CheckM:  
179 assessing the quality of microbial genomes recovered from isolates, single cells, and  
180 metagenomes. *Genome Res* 25:1043-1055.

181 15. Seemann T. 2014. Prokka: rapid prokaryotic genome annotation. *Bioinformatics*  
182 30:2068-2069.

183

184
