# Supplementary material for: Characterization of the First “Candidatus Nitrotoga” Isolate Reveals Metabolic Versatility and Separate Evolution of Widespread Nitrite-Oxidizing Bacteria
Source: PubMed Central journal article supplement (PMC6050957; doi:10.1128/mbio.01186-18), 2018-07-10
Supplement: mbo004183968st1.pdf [file mbo004183968st1.pdf]

**Table S1.** Kinetic constants of nitrite oxidation of NOB isolates and “*Ca. Nitrotoga*” enrichments.

| Organism                                                                      | $K_{m(\text{app})}$ ( $\mu\text{M NO}_2^-$ ) | $V_{\text{max}}$ ( $\mu\text{mol NO}_2^- \text{ mg protein}^{-1} \text{ h}^{-1}$ ) | $V_{\text{max}}$ ( $\text{fmol NO}_2^- \text{ cell}^{-1} \text{ h}^{-1}$ ) | Reference  |
|-------------------------------------------------------------------------------|----------------------------------------------|------------------------------------------------------------------------------------|----------------------------------------------------------------------------|------------|
| “ <i>Ca. Nitrotoga fabula</i> KNB” (isolate, WWTP)                            | 89                                           | 28                                                                                 | ND <sup>b</sup>                                                            | This study |
| “ <i>Ca. Nitrotoga arctica</i> ” (enrichment, arctic soil)                    | 58                                           | 26                                                                                 | ND                                                                         | (1)        |
| “ <i>Ca. Nitrotoga</i> sp. AM1” (enrichment, eelgrass sediment)               | 25                                           | ND                                                                                 | 6.1                                                                        | (2)        |
| <i>Nitrospira defluvii</i> (isolate, WWTP)                                    | 9                                            | 48                                                                                 | ND                                                                         | (1)        |
| <i>Nitrospira lenta</i> BS10 (isolate, WWTP)                                  | 27                                           | 20                                                                                 | ND                                                                         | (1)        |
| <i>Nitrospira</i> sp. ND1 (isolate, WWTP)                                     | 6                                            | 45                                                                                 | ND                                                                         | (3)        |
| <i>Nitrospira japonica</i> NJ1 (isolate, WWTP)                                | 10                                           | 31                                                                                 | ND                                                                         | (3)        |
| <i>Nitrospira moscoviensis</i> (isolate, corroded iron pipe)                  | 9                                            | 18                                                                                 | ND                                                                         | (1)        |
| <i>Nitrospira marina</i> Ecomares 2.1 (isolate, marine aquaculture biofilter) | 54                                           | 21                                                                                 | ND                                                                         | (4)        |
| <i>Nitrospira inopinata</i> (isolate, hot groundwater) <sup>a</sup>           | 449                                          | 17                                                                                 | ND                                                                         | (5)        |
| <i>Nitrobacter hamburgensis</i> (isolate, soil)                               | 540 - 1,370                                  | ND                                                                                 | 1 - 3.3                                                                    | (6)        |
| <i>Nitrobacter hamburgensis</i> (isolate, soil)                               | 544                                          | 64                                                                                 | ND                                                                         | (1)        |
| <i>Nitrobacter winogradskyi</i> (isolate, soil)                               | 36 - 260                                     | ND                                                                                 | 1.9 - 3.7                                                                  | (6)        |
| <i>Nitrobacter winogradskyi</i> (isolate, soil)                               | 309                                          | 78                                                                                 | ND                                                                         | (1)        |
| <i>Nitrobacter vulgaris</i> (isolate, sewage)                                 | 49                                           | 164                                                                                | ND                                                                         | (1)        |
| <i>Nitrobacter</i> sp. 311 (isolate, ocean surface water)                     | 28                                           | 95                                                                                 | ND                                                                         | (4)        |
| <i>Nitrolancea hollandica</i> Lb (isolate, WWTP)                              | 1,000                                        | ND                                                                                 | ND                                                                         | (7)        |
| <i>Nitrococcus mobilis</i> 231 (isolate, ocean surface water)                 | 120                                          | 141                                                                                | ND                                                                         | (4)        |
| <i>Nitrospina watsonii</i> 347 (isolate, Black Sea)                           | 19                                           | 37                                                                                 | ND                                                                         | (4)        |

<sup>a</sup>*N. inopinata* is a complete ammonia oxidizer (comammox organism).

<sup>b</sup>ND=not determined.

## References for Table S1

1. Nowka B, Daims H, Spieck E. 2015. Comparison of oxidation kinetics of nitrite-oxidizing bacteria: nitrite availability as a key factor in niche differentiation. *Appl Environ Microbiol* 81:745-753.
2. Ishii K, Fujitani H, Soh K, Nakagawa T, Takahashi R, Tsuneda S. 2017. Enrichment and physiological characterization of a cold-adapted nitrite-oxidizing *Nitrotoga* sp from an eelgrass sediment. *Appl Environ Microbiol* 83:e00549-17.
3. Ushiki N, Jinno M, Fujitani H, Suenaga T, Terada A, Tsuneda S. 2017. Nitrite oxidation kinetics of two *Nitrospira* strains: The quest for competition and ecological niche differentiation. *J Biosci Bioeng* 123:581-589.
4. Jacob J, Nowka B, Merten V, Sanders T, Spieck E, Dahnke K. 2017. Oxidation kinetics and inverse isotope effect of marine nitrite-oxidizing isolates. *Aquat Microb Ecol* 80:289-300.
5. Kits KD, Sedlacek CJ, Lebedeva EV, Han P, Bulaev A, Pjevac P, Daebeler A, Romano S, Albertsen M, Stein LY, Daims H, Wagner M. 2017. Kinetic analysis of a complete nitrifier reveals an oligotrophic lifestyle. *Nature* 549:269-272.
6. Both GJ, Gerards S, Laanbroek HJ. 1992. Kinetics of nitrite oxidation in two *Nitrobacter* species grown in nitrite-limited chemostats. *Arch Microbiol* 157:436-441.
7. Sorokin D, Lücker S, Vejmekova D, Kleerbezem R, Muyzer G, Sinninghe-Damsté J, Wagner M, Le Paslier D, van Loosdrecht M, Daims H. 2012. Nitrification expanded: Discovery, physiology, and genomics of a nitrite-oxidizing bacterium from the phylum *Chloroflexi*. *ISME J* 6:2245-2256.
