# Supplementary material for: Characterization of the First “Candidatus Nitrotoga” Isolate Reveals Metabolic Versatility and Separate Evolution of Widespread Nitrite-Oxidizing Bacteria
Source: PubMed Central journal article supplement (PMC6050957; doi:10.1128/mbio.01186-18), 2018-07-10
Supplement: mbo004183968st2.pdf [file mbo004183968st2.pdf]

**Table S2.** Overview of key features of the “*Ca. N. fabula* KNB” genome.

|                                                         | Chromosome   | Plasmid  |
|---------------------------------------------------------|--------------|----------|
| Genome size                                             | 2,609,426 bp | 5,404 bp |
| Average G+C content                                     | 50.14%       | 63.55%   |
| Number of genomic objects [CDS, fragment CDS, (r,t)RNA] | 2,664        | 6        |
| Number of coding sequences (CDS)                        | 2,609        | 6        |
| rRNA operons                                            | 2            | 0        |
| tRNA genes                                              | 42           | 0        |
| Coding density                                          | 84.98%       | 62.71%   |
| Repeated regions                                        | 5.04%        | 0        |

  

| Chromosome clusters of orthologous groups (COG) automated classification |                                                               |     |         |
|--------------------------------------------------------------------------|---------------------------------------------------------------|-----|---------|
| Functional category                                                      |                                                               | CDS | CDS (%) |
| D                                                                        | Cell cycle control, cell division, chromosome partitioning    | 38  | 1.46    |
| M                                                                        | Cell wall/membrane/envelope biogenesis                        | 174 | 6.69    |
| N                                                                        | Cell motility                                                 | 14  | 0.54    |
| O                                                                        | Posttranslational modification, protein turnover, chaperones  | 126 | 4.84    |
| T                                                                        | Signal transduction mechanisms                                | 65  | 2.50    |
| U                                                                        | Intracellular trafficking, secretion, and vesicular transport | 60  | 2.31    |
| V                                                                        | Defense mechanisms                                            | 36  | 1.38    |
| A                                                                        | RNA processing and modification                               | 1   | 0.04    |
| J                                                                        | Translation, ribosomal structure and biogenesis               | 151 | 5.81    |
| K                                                                        | Transcription                                                 | 100 | 3.85    |
| L                                                                        | Replication, recombination and repair                         | 170 | 6.54    |
| C                                                                        | Energy production and conversion                              | 125 | 4.81    |
| E                                                                        | Amino acid transport and metabolism                           | 154 | 5.92    |
| F                                                                        | Nucleotide transport and metabolism                           | 57  | 2.19    |
| G                                                                        | Carbohydrate transport and metabolism                         | 87  | 3.35    |
| H                                                                        | Coenzyme transport and metabolism                             | 106 | 4.08    |
| I                                                                        | Lipid transport and metabolism                                | 49  | 1.88    |
| P                                                                        | Inorganic ion transport and metabolism                        | 130 | 5.00    |
| Q                                                                        | Secondary metabolites biosynthesis, transport and catabolism  | 38  | 1.46    |
