# Supplementary material for: Characterization of the First “Candidatus Nitrotoga” Isolate Reveals Metabolic Versatility and Separate Evolution of Widespread Nitrite-Oxidizing Bacteria
Source: PubMed Central journal article supplement (PMC6050957; doi:10.1128/mbio.01186-18), 2018-07-10
Supplement: mbo004183968st3.pdf [file mbo004183968st3.pdf]

**Table S3.** Proteins encoded by the plasmid of “*Ca. N. fabula* KNB” and their closest homologs in the TrEMBL, Swiss-Prot, and NCBI nr databases.

| Plasmid Gene | Predicted function                                             | Database   | Best hit, accession no. | Best hit, identity (%) | Best hit, predicted function                             | Best hit, organism                    |
|--------------|----------------------------------------------------------------|------------|-------------------------|------------------------|----------------------------------------------------------|---------------------------------------|
| NITFABP_0001 | Protein of unknown function                                    | TrEMBL     | A0A0F3GCT4              | 69                     | Uncharacterized protein                                  | <i>Pseudomonas pseudoalcaligenes</i>  |
|              |                                                                | Swiss-Prot | P20085                  | 49                     | Mobilization protein MobL                                | <i>Acidithiobacillus ferrooxidans</i> |
|              |                                                                | nr         | XP_012260969            | 99                     | uncharacterized protein LOC105688902                     | <i>Athalia rosae</i> <sup>a</sup>     |
| NITFABP_0002 | Putative protein involved in initiation of plasmid replication | TrEMBL     | A0A1I3FIQ5              | 83                     | Initiator Replication protein                            | <i>Paracoccus aminovorans</i>         |
|              |                                                                | Swiss-Prot | P17492                  | 29                     | Replication protein                                      | <i>Neisseria gonorrhoeae</i>          |
|              |                                                                | nr         | XP_012260970            | 100                    | uncharacterized protein LOC105688903                     | <i>Athalia rosae</i> <sup>a</sup>     |
| NITFABP_0003 | Conserved protein of unknown function                          | TrEMBL     | A0A212B9I4              | 71                     | Uncharacterized protein                                  | <i>Pseudomonas</i> sp. A46            |
|              |                                                                | Swiss-Prot | No hit                  |                        |                                                          |                                       |
|              |                                                                | nr         | WP_088193532            | 71                     | hypothetical protein                                     | <i>Pseudomonas</i> sp. A46            |
| NITFABP_0004 | Putative transcriptional regulator, TetR family                | TrEMBL     | A7KK53                  | 100                    | Putative transcriptional regulator                       | <i>Delftia acidovorans</i>            |
|              |                                                                | Swiss-Prot | P39897                  | 34                     | HTH-type transcriptional regulator MtrR                  | <i>Neisseria gonorrhoeae</i>          |
|              |                                                                | nr         | WP_043008328            | 100                    | TetR/AcrR family transcriptional regulator               | <i>Comamonas testosteronii</i>        |
| NITFABP_0005 | Quaternary ammonium compound-resistance protein EmrE           | TrEMBL     | A7TX95                  | 100                    | Small multidrug resistance protein                       | <i>Delftia tsuruhatensis</i>          |
|              |                                                                | Swiss-Prot | Q9X2N9                  | 59                     | Quaternary ammonium compound-resistance protein QacF     | <i>Klebsiella aerogenes</i>           |
|              |                                                                | nr         | WP_043008326            | 100                    | quaternary ammonium compound efflux SMR transporter QacF | <i>Comamonas testosteronii</i>        |
| NITFABP_0006 | Putative Mobilization protein, MobS-like                       | TrEMBL     | A0A238DWW0              | 84                     | Uncharacterized protein                                  | <i>Thiomonas</i> sp. X19              |
|              |                                                                | Swiss-Prot | P20086                  | 51                     | Mobilization protein MobS                                | <i>Acidithiobacillus ferrooxidans</i> |
|              |                                                                | nr         | ART89884                | 70                     | hypothetical protein                                     | uncultured bacterium                  |

<sup>a</sup>The presence of these genes in the genome sequence of the insect *A. rosae* is interesting. However, since all genes on the plasmid of “*Ca. N. fabula*” have close homologs in members of the Proteobacteria, we consider the plasmid to be of proteobacterial origin.
