# Supplementary material for: Characterization of the First “Candidatus Nitrotoga” Isolate Reveals Metabolic Versatility and Separate Evolution of Widespread Nitrite-Oxidizing Bacteria
Source: PubMed Central journal article supplement (PMC6050957; doi:10.1128/mbio.01186-18), 2018-07-10
Supplement: mbo004183968st4.pdf [file mbo004183968st4.pdf]

**Table S4.** Proteins of “*Ca. N. fabula*” with predicted functions in key metabolic pathways, and genes of “*Ca. N. fabula*” coding for rRNAs or tRNAs. Proteins with an amino acid identity  $\geq 35\%$  (over at least 80% of the sequence lengths) to characterized proteins in the SwissProt or TrEMBL databases were annotated as homologous to proteins with a known function. Proteins with an amino acid identity  $\geq 25\%$  (over at least 80% of the sequence lengths) to characterized proteins or signatures in the aforementioned databases were annotated as putative homologs of the respective database entries.

| Central Carbon Metabolism      |             |      |         |         |              |                                                         |
|--------------------------------|-------------|------|---------|---------|--------------|---------------------------------------------------------|
| Pathway                        | Identifier  | Type | Begin   | End     | Gene         | Product                                                 |
| C-fixation                     | NITFAB_0176 | CDS  | 159745  | 160809  | <i>fda</i>   | Fructose-1,6-bisphosphate aldolase, class II            |
| C-fixation                     | NITFAB_0177 | CDS  | 160899  | 162338  | <i>pykA</i>  | Pyruvate kinase                                         |
| C-fixation                     | NITFAB_0178 | CDS  | 162355  | 163539  | <i>pgk</i>   | Phosphoglycerate kinase                                 |
| C-fixation                     | NITFAB_0179 | CDS  | 163617  | 164612  | <i>gapA</i>  | Glyceraldehyde-3-phosphate dehydrogenase A              |
| C-fixation                     | NITFAB_0181 | CDS  | 165202  | 167217  | <i>tktA</i>  | Transketolase 1, thiamin-binding                        |
| C-fixation                     | NITFAB_0347 | CDS  | 350588  | 353368  | <i>ppc</i>   | Phosphoenolpyruvate carboxylase                         |
| C-fixation                     | NITFAB_0411 | CDS  | 418433  | 419437  | <i>fbp</i>   | Fructose-1,6-bisphosphatase class I                     |
| C-fixation                     | NITFAB_0432 | CDS  | 441142  | 442029  | <i>cbbP</i>  | Phosphoribulokinase                                     |
| C-fixation                     | NITFAB_1072 | CDS  | 1103461 | 1105800 | <i>cbbO</i>  | von Willebrand factor type A                            |
| C-fixation                     | NITFAB_1073 | CDS  | 1105873 | 1106688 | <i>cbbQ</i>  | CbbQ                                                    |
| C-fixation                     | NITFAB_1074 | CDS  | 1106824 | 1107180 | <i>cbbS1</i> | Ribulose bisphosphate carboxylase/oxygenase small chain |
| C-fixation                     | NITFAB_1075 | CDS  | 1107243 | 1108664 | <i>cbbL1</i> | Ribulose bisphosphate carboxylase/oxygenase large chain |
| C-fixation                     | NITFAB_1105 | CDS  | 1141097 | 1141852 | <i>tpiA</i>  | Triosephosphate isomerase                               |
| C-fixation                     | NITFAB_1227 | CDS  | 1242715 | 1243149 | <i>cbbS2</i> | Ribulose bisphosphate carboxylase/oxygenase small chain |
| C-fixation                     | NITFAB_1228 | CDS  | 1243171 | 1244646 | <i>cbbL2</i> | Ribulose bisphosphate carboxylase/oxygenase large chain |
| C-fixation                     | NITFAB_1234 | CDS  | 1251630 | 1254005 | <i>xpkA</i>  | Xylulose-5-phosphate phosphoketolase                    |
| C-fixation                     | NITFAB_1933 | CDS  | 1931517 | 1932245 | <i>rpe</i>   | Ribulose-phosphate 3-epimerase                          |
| C-fixation                     | NITFAB_2483 | CDS  | 2497131 | 2497790 | <i>rpiA</i>  | Ribose 5-phosphate isomerase, constitutive              |
| Glycogen formation/degradation | NITFAB_0535 | CDS  | 533427  | 534872  | <i>glgA</i>  | Glycogen synthase                                       |
| Glycogen formation/degradation | NITFAB_0599 | CDS  | 592567  | 593943  | <i>pgm</i>   | Phosphoglucomutase                                      |
| Glycogen formation/degradation | NITFAB_2047 | CDS  | 2053431 | 2054711 | <i>glgC</i>  | glucose-1-phosphate adenylyltransferase                 |
| Glycogen formation/degradation | NITFAB_2048 | CDS  | 2054819 | 2057017 | <i>glgB</i>  | 1,4-alpha-glucan branching enzyme                       |
| Glycogen formation/degradation | NITFAB_2215 | CDS  | 2227727 | 2229445 |              | Putative Phosphorylase                                  |
| Glycolysis/Gluconeogenesis     | NITFAB_0176 | CDS  | 159745  | 160809  | <i>fda</i>   | Fructose-1,6-bisphosphate aldolase, class II            |
| Glycolysis/Gluconeogenesis     | NITFAB_0177 | CDS  | 160899  | 162338  | <i>pykA</i>  | Pyruvate kinase                                         |
| Glycolysis/Gluconeogenesis     | NITFAB_0178 | CDS  | 162355  | 163539  | <i>pgk</i>   | Phosphoglycerate kinase                                 |
| Glycolysis/Gluconeogenesis     | NITFAB_0179 | CDS  | 163617  | 164612  | <i>gapA</i>  | Glyceraldehyde-3-phosphate dehydrogenase A              |
| Glycolysis/Gluconeogenesis     | NITFAB_0411 | CDS  | 418433  | 419437  | <i>fbp</i>   | Fructose-1,6-bisphosphatase class I                     |
| Glycolysis/Gluconeogenesis     | NITFAB_0599 | CDS  | 592567  | 593943  | <i>pgm</i>   | Phosphoglucomutase                                      |
| Glycolysis/Gluconeogenesis     | NITFAB_0652 | CDS  | 652423  | 653409  | <i>glk</i>   | Glucokinase                                             |
| Glycolysis/Gluconeogenesis     | NITFAB_1105 | CDS  | 1141097 | 1141852 | <i>tpiA</i>  | Triosephosphate isomerase                               |
| Glycolysis/Gluconeogenesis     | NITFAB_1993 | CDS  | 1995346 | 1996629 | <i>eno</i>   | enolase                                                 |

|                            |             |     |         |         |             |                                                                                              |
|----------------------------|-------------|-----|---------|---------|-------------|----------------------------------------------------------------------------------------------|
| Glycolysis/Gluconeogenesis | NITFAB_2049 | CDS | 2057251 | 2058894 | <i>pgi</i>  | glucosephosphate isomerase                                                                   |
| Glycolysis/Gluconeogenesis | NITFAB_2281 | CDS | 2292994 | 2294520 | <i>gpml</i> | phosphoglycerat mutase, cofactor-independent                                                 |
| Glycolysis/Gluconeogenesis | NITFAB_2363 | CDS | 2367922 | 2369181 |             | putative Pyrophosphate--fructose 6-phosphate 1-phosphotransferase                            |
| Glyoxylate Shunt           | NITFAB_0625 | CDS | 618890  | 619543  | <i>gph2</i> | Phosphoglycolate phosphatase                                                                 |
| Glyoxylate Shunt           | NITFAB_0676 | CDS | 687556  | 689046  | <i>glcD</i> | Glycolate oxidase GlcD subunit, FAD-linked                                                   |
| Glyoxylate Shunt           | NITFAB_0677 | CDS | 689046  | 690110  | <i>glcE</i> | Glycolate oxidase FAD binding GlcE subunit                                                   |
| Glyoxylate Shunt           | NITFAB_0678 | CDS | 690118  | 691335  | <i>glcF</i> | glycolate oxidase iron-sulfur GlcF subunit                                                   |
| Glyoxylate Shunt           | NITFAB_2021 | CDS | 2026998 | 2027972 | <i>mcl</i>  | Malyl-CoA lyase                                                                              |
| Glyoxylate Shunt           | NITFAB_2022 | CDS | 2027982 | 2029160 | <i>mka</i>  | Probable Malate--CoA ligase, subunit beta                                                    |
| Glyoxylate Shunt           | NITFAB_2023 | CDS | 2029182 | 2030054 | <i>sucD</i> | Probable Malate--CoA ligase, alpha subunit                                                   |
| Glyoxylate Shunt           | NITFAB_2118 | CDS | 2126338 | 2127354 | <i>mdh</i>  | Malate dehydrogenase                                                                         |
| Pentose-phosphate pathway  | NITFAB_0176 | CDS | 159745  | 160809  | <i>fda</i>  | Fructose-1,6-bisphosphate aldolase, class II                                                 |
| Pentose-phosphate pathway  | NITFAB_0181 | CDS | 165202  | 167217  | <i>tktA</i> | Transketolase, thiamin-binding                                                               |
| Pentose-phosphate pathway  | NITFAB_0411 | CDS | 418433  | 419437  | <i>fbp</i>  | Fructose-1,6-bisphosphatase class I                                                          |
| Pentose-phosphate pathway  | NITFAB_0549 | CDS | 549127  | 550080  | <i>prs</i>  | ribose-phosphate pyrophosphokinase (Phosphoribosyl pyrophosphate synthetase)                 |
| Pentose-phosphate pathway  | NITFAB_0599 | CDS | 592567  | 593943  | <i>pgm</i>  | Phosphoglucomutase                                                                           |
| Pentose-phosphate pathway  | NITFAB_0788 | CDS | 813734  | 814645  |             | putative 6-phosphogluconate dehydrogenase                                                    |
| Pentose-phosphate pathway  | NITFAB_1234 | CDS | 1251630 | 1254005 | <i>xpkA</i> | Xylulose-5-phosphate phosphoketolase                                                         |
| Pentose-phosphate pathway  | NITFAB_2044 | CDS | 2048141 | 2048860 |             | putative 6-phosphogluconolactonase                                                           |
| Pentose-phosphate pathway  | NITFAB_2049 | CDS | 2057251 | 2058894 | <i>pgi</i>  | glucosephosphate isomerase                                                                   |
| Pentose-phosphate pathway  | NITFAB_2453 | CDS | 2465032 | 2465793 | <i>rpe</i>  | D-ribulose-5-phosphate 3-epimerase                                                           |
| Pentose-phosphate pathway  | NITFAB_2473 | CDS | 2486672 | 2487757 |             | putative Transaldolase                                                                       |
| Pentose-phosphate pathway  | NITFAB_2474 | CDS | 2487861 | 2489324 | <i>zwf</i>  | Glucose-6-phosphate 1-dehydrogenase                                                          |
| Pentose-phosphate pathway  | NITFAB_2483 | CDS | 2497131 | 2497790 | <i>rpiA</i> | Ribose 5-phosphate isomerase, constitutive                                                   |
| TCA Cycle                  | NITFAB_0684 | CDS | 698060  | 698434  | <i>sdhC</i> | Succinate dehydrogenase, cytochrome b556 subunit                                             |
| TCA Cycle                  | NITFAB_0685 | CDS | 698428  | 698802  | <i>sdhD</i> | Succinate dehydrogenase, hydrophobic membrane anchor protein                                 |
| TCA Cycle                  | NITFAB_0686 | CDS | 698802  | 700565  | <i>sdhA</i> | Succinate dehydrogenase, flavoprotein subunit                                                |
| TCA Cycle                  | NITFAB_0687 | CDS | 700925  | 701620  | <i>sdhB</i> | Succinate dehydrogenase, iron-sulfur subunit                                                 |
| TCA Cycle                  | NITFAB_0689 | CDS | 701857  | 703200  | <i>gltA</i> | Citrate synthase                                                                             |
| TCA Cycle                  | NITFAB_0690 | CDS | 703316  | 706222  | <i>sucA</i> | 2-oxoglutarate dehydrogenase, E1 component                                                   |
| TCA Cycle                  | NITFAB_0691 | CDS | 706240  | 707400  | <i>sucB</i> | 2-oxoglutarate dehydrogenase, dihydrolipoyllysine-residue succinyltransferase (E2) component |
| TCA Cycle                  | NITFAB_0692 | CDS | 707529  | 708953  | <i>lpdG</i> | 2-oxo-acid dehydrogenase, dihydrolipoamide dehydrogenase (E3) component                      |
| TCA Cycle                  | NITFAB_1259 | CDS | 1283730 | 1284977 | <i>icd</i>  | isocitrate dehydrogenase                                                                     |
| TCA Cycle                  | NITFAB_1443 | CDS | 1484837 | 1486219 | <i>fumC</i> | fumarate hydratase (fumarase C), aerobic Class II                                            |
| TCA Cycle                  | NITFAB_2118 | CDS | 2126338 | 2127354 | <i>mdh</i>  | Malate dehydrogenase                                                                         |
| TCA Cycle                  | NITFAB_2202 | CDS | 2216587 | 2217468 | <i>sucD</i> | Succinyl-CoA ligase [ADP-forming], subunit alpha                                             |
| TCA Cycle                  | NITFAB_2203 | CDS | 2217456 | 2218634 | <i>sucC</i> | Succinyl-CoA ligase [ADP-forming] subunit beta                                               |

|                            |              |             |              |            |             |                                                                                                  |
|----------------------------|--------------|-------------|--------------|------------|-------------|--------------------------------------------------------------------------------------------------|
| TCA Cycle                  | NITFAB_2306  | CDS         | 2313435      | 2316161    | <i>acnA</i> | aconitate hydratase 1                                                                            |
| TCA Cycle                  | NITFAB_2386  | CDS         | 2393636      | 2395429    | <i>lpdA</i> | 2-oxo-acid dehydrogenase complex, Dihydrolipoamide dehydrogenase (E3) component                  |
| <b>Hydrogen Metabolism</b> |              |             |              |            |             |                                                                                                  |
| <b>Pathway</b>             | <b>Label</b> | <b>Type</b> | <b>Begin</b> | <b>End</b> | <b>Gene</b> | <b>Product</b>                                                                                   |
| Hydrogen Metabolism        | NITFAB_0289  | CDS         | 287290       | 287868     | <i>hupE</i> | Hydrogenase/urease accessory protein HupE/UreJ                                                   |
| Hydrogen Metabolism        | NITFAB_1062  | CDS         | 1092550      | 1094052    | <i>hoxH</i> | [NiFe] NAD-reducing hydrogenase, large subunit HoxH                                              |
| Hydrogen Metabolism        | NITFAB_1063  | CDS         | 1094046      | 1094534    | <i>hoxW</i> | Hydrogenase maturation protease                                                                  |
| Hydrogen Metabolism        | NITFAB_1064  | CDS         | 1094558      | 1094899    | <i>hypA</i> | Hydrogenase nickel incorporation protein HypA                                                    |
| Hydrogen Metabolism        | NITFAB_1065  | CDS         | 1094936      | 1095838    | <i>hypB</i> | Hydrogenase nickel incorporation protein HypB                                                    |
| Hydrogen Metabolism        | NITFAB_1066  | CDS         | 1095810      | 1096946    | <i>hypF</i> | Carbamoyltransferase HypF (fragment)                                                             |
| Hydrogen Metabolism        | NITFAB_1067  | CDS         | 1096960      | 1097202    | <i>hypC</i> | Hydrogenase expression/formation protein HypC                                                    |
| Hydrogen Metabolism        | NITFAB_1068  | CDS         | 1097199      | 1098314    | <i>hypD</i> | Hydrogenase expression/formation protein HypD                                                    |
| Hydrogen Metabolism        | NITFAB_1069  | CDS         | 1098311      | 1099360    | <i>hypE</i> | Hydrogenase maturation protein HypE                                                              |
| Hydrogen Metabolism        | NITFAB_1663  | CDS         | 1683318      | 1683854    | <i>hoxY</i> | [NiFe] NAD-reducing hydrogenase, small subunit HoxY                                              |
| Hydrogen Metabolism        | NITFAB_1664  | CDS         | 1683851      | 1684696    | <i>hoxU</i> | [NiFe] NAD-reducing hydrogenase, subunit HoxU                                                    |
| Hydrogen Metabolism        | NITFAB_1665  | CDS         | 1684672      | 1686498    | <i>hoxF</i> | [NiFe] NAD-reducing hydrogenase, subunit HoxF                                                    |
| <b>Miscellaneous</b>       |              |             |              |            |             |                                                                                                  |
| <b>Pathway</b>             | <b>Label</b> | <b>Type</b> | <b>Begin</b> | <b>End</b> | <b>Gene</b> | <b>Product</b>                                                                                   |
| Amino Acid Transport       | NITFAB_1244  | CDS         | 1265623      | 1268685    |             | putative Amino acid ABC transporter, permease protein, 3-TM region, His/Glu/Gln/Arg/opine family |
| Amino Acid Transport       | NITFAB_1245  | CDS         | 1268682      | 1269785    |             | putative ABC-type polar amino acid transport system, ATPase component                            |
| Arsenic Resistance         | NITFAB_1123  | CDS         | 1150900      | 1151916    |             | Transcriptional regulator, ArsR family                                                           |
| Arsenic Resistance         | NITFAB_1500  | CDS         | 1547297      | 1547692    | <i>arsC</i> | arsenate reductase                                                                               |
| Arsenic Resistance         | NITFAB_1579  | CDS         | 1615184      | 1615585    |             | Transcriptional regulator, ArsR family                                                           |
| Arsenic Resistance         | NITFAB_2149  | CDS         | 2162629      | 2162961    |             | putative Transcriptional regulator, ArsR family                                                  |
| Arsenic Resistance         | NITFAB_2150  | CDS         | 2162958      | 2163725    |             | putative NADPH-dependent FMN reductase, Arsenical resistance protein                             |
| Arsenic Resistance         | NITFAB_2151  | CDS         | 2163722      | 2164228    |             | putative Arsenate reductase                                                                      |
| Arsenic Resistance         | NITFAB_2217  | CDS         | 2230354      | 2230785    |             | putative Transcriptional regulator, ArsR family                                                  |
| Branched AA Transport      | NITFAB_0006  | CDS         | 5844         | 7028       | <i>livK</i> | leucine/isoleucine/valine transporter subunit; periplasmic-binding component of ABC superfamily  |
| Branched AA Transport      | NITFAB_0007  | CDS         | 7088         | 8011       | <i>livH</i> | leucine/isoleucine/valine transporter subunit; membrane component of ABC superfamily             |
| Branched AA Transport      | NITFAB_0008  | CDS         | 7995         | 9107       | <i>livM</i> | leucine/isoleucine/valine transporter subunit; membrane component of ABC superfamily             |
| Branched AA Transport      | NITFAB_0009  | CDS         | 9113         | 9922       | <i>livG</i> | leucine/isoleucine/valine transporter subunit; ATP-binding component of ABC superfamily          |
| Branched AA Transport      | NITFAB_0010  | CDS         | 9962         | 10690      | <i>livF</i> | leucine/isoleucine/valine transporter subunit; ATP-binding component of ABC superfamily          |
| Calcium Transport          | NITFAB_0651  | CDS         | 649611       | 652247     | <i>tcaB</i> | Calcium-transporting ATPase                                                                      |

|                         |             |     |         |         |              |                                                                                 |
|-------------------------|-------------|-----|---------|---------|--------------|---------------------------------------------------------------------------------|
| Calcium Transport       | NITFAB_1239 | CDS | 1260412 | 1261389 |              | putative Sodium/potassium/calcium antiporter CaxA                               |
| Carbonic Anhydrases     | NITFAB_0956 | CDS | 995979  | 996668  | <i>cynT1</i> | Carbonic anhydrase                                                              |
| Carbonic Anhydrases     | NITFAB_1300 | CDS | 1326582 | 1327205 | <i>cynT2</i> | Carbonic anhydrase                                                              |
| Carbonic Anhydrases     | NITFAB_1418 | CDS | 1463115 | 1463750 |              | putative Carbonic anhydrase                                                     |
| Catalase                | NITFAB_1016 | CDS | 1046232 | 1048457 | <i>katG</i>  | catalase/hydroperoxidase HPI(I)                                                 |
| Catalase                | NITFAB_1541 | CDS | 1584179 | 1586377 | <i>katG</i>  | catalase/hydroperoxidase HPI(I)                                                 |
| Catalase                | NITFAB_1652 | CDS | 1667427 | 1669601 | <i>katG</i>  | catalase/hydroperoxidase HPI(I)                                                 |
| Chlorite Dismutase      | NITFAB_1630 | CDS | 1651185 | 1652057 | <i>cld</i>   | Chlorite dismutase                                                              |
| Chlorite Dismutase      | NITFAB_2070 | CDS | 2082825 | 2083667 | <i>cld</i>   | Chlorite dismutase                                                              |
| Co/Zn/Cd Export         | NITFAB_1397 | CDS | 1438159 | 1441356 | <i>czcA</i>  | Cobalt-zinc-cadmium resistance protein CzcA (Cation efflux system protein CzcA) |
| Co/Zn/Cd Export         | NITFAB_1398 | CDS | 1441377 | 1442879 | <i>czcB</i>  | Cobalt-zinc-cadmium resistance protein CzcB                                     |
| Co/Zn/Cd Export         | NITFAB_1399 | CDS | 1442917 | 1444209 | <i>czcC</i>  | Cobalt-zinc-cadmium resistance protein CzcC                                     |
| CRISPR/CAS              | NITFAB_1828 | CDS | 1819684 | 1820550 |              | putative CRISPR-associated RAMP protein, Cmr4 family                            |
| CRISPR/CAS              | NITFAB_2256 | CDS | 2265092 | 2265397 |              | putative CRISPR-associated endoribonuclease Cas2                                |
| CRISPR/CAS              | NITFAB_2257 | CDS | 2265425 | 2266354 |              | putative CRISPR-associated endonuclease Cas1                                    |
| CRISPR/CAS              | NITFAB_2258 | CDS | 2266360 | 2268777 |              | putative CRISPR-associated endonuclease, cas9                                   |
| Cytochrome c biogenesis | NITFAB_0081 | CDS | 70926   | 72869   | <i>ccmF</i>  | heme lyase, CcmF subunit                                                        |
| Cytochrome c biogenesis | NITFAB_0082 | CDS | 72881   | 73408   | <i>ccmG</i>  | periplasmic thioredoxin of cytochrome c-type biogenesis                         |
| Cytochrome c biogenesis | NITFAB_0083 | CDS | 73398   | 73892   | <i>ccmH</i>  | Cytochrome C biogenesis protein                                                 |
| Cytochrome c biogenesis | NITFAB_0084 | CDS | 73889   | 75145   |              | putative Cytochrome c-type biogenesis protein                                   |
| Cytochrome c biogenesis | NITFAB_0203 | CDS | 193708  | 194415  |              | putative DsbA-like protein                                                      |
| Cytochrome c biogenesis | NITFAB_0437 | CDS | 447234  | 449078  | <i>dsbD</i>  | Thiol:disulfide interchange protein DsbD                                        |
| Cytochrome c biogenesis | NITFAB_2312 | CDS | 2320186 | 2320662 | <i>ccmE</i>  | heme chaperone                                                                  |
| Cytochrome c biogenesis | NITFAB_2313 | CDS | 2320786 | 2320950 |              | putative Heme exporter protein CcmD (fragment)                                  |
| Cytochrome c biogenesis | NITFAB_2314 | CDS | 2320947 | 2321624 | <i>ccmC</i>  | heme exporter subunit; membrane component of ABC superfamily                    |
| Cytochrome c biogenesis | NITFAB_2315 | CDS | 2321716 | 2322399 | <i>ccmB</i>  | heme exporter subunit; membrane component of ABC superfamily                    |
| Cytochrome c biogenesis | NITFAB_2316 | CDS | 2322396 | 2323010 | <i>ccmA</i>  | heme exporter subunit; ATP-binding component of ABC superfamily                 |
| Cytochrome c biogenesis | NITFAB_2519 | CDS | 2533438 | 2533950 |              | putative Disulfide bond formation protein B DsbB                                |
| Cytochromes             | NITFAB_0005 | CDS | 4899    | 5273    |              | putative Cytochrome c class I                                                   |
| Cytochromes             | NITFAB_0057 | CDS | 49810   | 50406   |              | putative monohaem cytochrome c                                                  |
| Cytochromes             | NITFAB_0058 | CDS | 50531   | 51310   |              | Dihaem cytochrome c                                                             |
| Cytochromes             | NITFAB_0187 | CDS | 175579  | 176259  |              | Dihaem cytochrome c                                                             |
| Cytochromes             | NITFAB_0188 | CDS | 176249  | 176599  |              | Monohaem cytochrome c                                                           |
| Cytochromes             | NITFAB_0192 | CDS | 178774  | 179205  |              | putative Monohaem cytochrome c                                                  |
| Cytochromes             | NITFAB_1009 | CDS | 1042294 | 1042614 |              | putative Cytochrome c class I                                                   |
| Cytochromes             | NITFAB_1049 | CDS | 1077880 | 1078497 |              | putative Cytochrome b                                                           |
| Cytochromes             | NITFAB_1656 | CDS | 1670809 | 1672320 |              | putative Multahaem cytochrome c                                                 |
| Cytochromes             | NITFAB_1911 | CDS | 1906967 | 1907455 | <i>cybB</i>  | Cytochrome b561                                                                 |

|                                     |             |     |         |         |                         |                                                                                      |
|-------------------------------------|-------------|-----|---------|---------|-------------------------|--------------------------------------------------------------------------------------|
| Cytochromes                         | NITFAB_2103 | CDS | 2111941 | 2112516 |                         | putative cytochrome c                                                                |
| Cytochromes                         | NITFAB_2210 | CDS | 2223161 | 2223841 |                         | putative Cytochrome c-551                                                            |
| Cytochromes                         | NITFAB_2356 | CDS | 2360153 | 2361046 |                         | putative Cytochrome c family protein                                                 |
| FeS Cluster Assembly                | NITFAB_2525 | CDS | 2537721 | 2538206 | <i>sufU</i>             | FeS cluster assembly SUF system, sulfur-transfer protein SufU                        |
| FeS Cluster Assembly                | NITFAB_2527 | CDS | 2539462 | 2540769 | <i>sufD</i>             | FeS cluster assembly SUF system , protein SufD                                       |
| FeS Cluster Assembly                | NITFAB_2528 | CDS | 2540766 | 2541557 | <i>sufC</i>             | FeS cluster assembly SUF system, ATPase SufC                                         |
| FeS Cluster Assembly                | NITFAB_2529 | CDS | 2541554 | 2542990 | <i>sufB</i>             | FeS cluster assembly SUF system, protein SufB                                        |
| FeS Cluster Assembly                | NITFAB_2530 | CDS | 2543076 | 2543435 | <i>sufA</i>             | FeS cluster assembly SUF system, protein SufA                                        |
| Iron Metabolism                     | NITFAB_1367 | CDS | 1404069 | 1405892 |                         | putative siderophore biosynthesis protein                                            |
| Iron Metabolism                     | NITFAB_1371 | CDS | 1408682 | 1410799 |                         | putative TonB-dependent siderophore receptor                                         |
| Iron Metabolism                     | NITFAB_1391 | CDS | 1429456 | 1429860 |                         | putative ferric reductase (fragment)                                                 |
| Iron Metabolism                     | NITFAB_1392 | CDS | 1429820 | 1430251 |                         | putative ferric reductase (fragment)                                                 |
| Iron Metabolism                     | NITFAB_1393 | CDS | 1430369 | 1430788 |                         | putative Ferric reductase domain (fragment)                                          |
| Iron Metabolism                     | NITFAB_1692 | CDS | 1708850 | 1709389 |                         | putative Bacterioferritin                                                            |
| Iron Metabolism                     | NITFAB_1876 | CDS | 1855863 | 1858343 |                         | putative TonB-dependent siderophore receptor                                         |
| Iron Metabolism                     | NITFAB_1999 | CDS | 2005271 | 2006299 |                         | putative Ferric iron ABC transporter, iron-binding protein                           |
| Iron Metabolism                     | NITFAB_2000 | CDS | 2006309 | 2007955 |                         | putative Iron ABC transporter permease protein                                       |
| Iron Metabolism                     | NITFAB_2001 | CDS | 2008056 | 2009126 |                         | putative Fe(3+)-transporting ATPase                                                  |
| Iron Metabolism                     | NITFAB_2003 | CDS | 2009256 | 2009681 | <i>fur</i>              | DNA-binding transcriptional dual regulator of siderophore biosynthesis and transport |
| Iron Metabolism                     | NITFAB_2056 | CDS | 2066098 | 2068296 |                         | putative TonB-dependent receptor                                                     |
| Iron Metabolism                     | NITFAB_2086 | CDS | 2098496 | 2098960 | <i>bfr</i>              | bacterioferritin, iron storage and detoxification protein                            |
| Magnesium Transport                 | NITFAB_0324 | CDS | 325549  | 326814  |                         | putative magnesium/nickel/cobalt transporter (fragment)                              |
| Magnesium Transport                 | NITFAB_0408 | CDS | 411945  | 414539  | <i>mgfA</i>             | Magnesium-transporting ATPase, P-type 1                                              |
| Magnesium Transport                 | NITFAB_2346 | CDS | 2350309 | 2351763 |                         | putative Magnesium transporter                                                       |
| Mechanosensitive Channel            | NITFAB_0994 | CDS | 1027439 | 1027843 | <i>mscL</i>             | mechanosensitive channel                                                             |
| Molybdenum Transport                | NITFAB_2422 | CDS | 2430033 | 2431103 | <i>modC</i>             | Molybdenum import ATP-binding protein ModC                                           |
| Molybdenum Transport                | NITFAB_2423 | CDS | 2431100 | 2431804 | <i>modB</i>             | Molybdenum transport system permease protein ModB                                    |
| Molybdenum Transport                | NITFAB_2424 | CDS | 2431819 | 2432595 |                         | putative Molybdenum ABC transporter, periplasmic molybdenum-binding protein ModA     |
| Monovalent Cation/Proton Antiporter | NITFAB_1283 | CDS | 1307823 | 1309199 | <i>nhaA</i>             | Na(+)/H(+) antiporter NhaA                                                           |
| Monovalent Cation/Proton Antiporter | NITFAB_2132 | CDS | 2146579 | 2149503 | <i>mrpA</i><br><i>B</i> | monovalent cation/H(+) antiporter subunit A/B                                        |
| Monovalent Cation/Proton Antiporter | NITFAB_2133 | CDS | 2149503 | 2149850 | <i>mrpC</i>             | monovalent cation/H(+) antiporter subunit C                                          |
| Monovalent Cation/Proton Antiporter | NITFAB_2134 | CDS | 2149906 | 2151522 | <i>mrpD</i>             | proton transporter component of monovalent cation/H+ antiporter subunit D            |
| Monovalent Cation/Proton Antiporter | NITFAB_2135 | CDS | 2151474 | 2151716 |                         | protein of unknown function                                                          |

|                                                |              |     |         |         |              |                                                                                 |
|------------------------------------------------|--------------|-----|---------|---------|--------------|---------------------------------------------------------------------------------|
| Monovalent Cation/Proton Antiporter            | NITFAB_2136  | CDS | 2151519 | 2152007 |              | putative monovalent cation/H(+) antiporter subunit E                            |
| Monovalent Cation/Proton Antiporter            | NITFAB_2137  | CDS | 2152004 | 2152285 | <i>mrpF</i>  | monovalent cation/H(+) antiporter subunit F                                     |
| Monovalent Cation/Proton Antiporter            | NITFAB_2138  | CDS | 2152282 | 2152593 | <i>mrpG</i>  | monovalent cation/H(+) antiporter subunit G                                     |
| Peroxidase                                     | NITFAB_1212  | CDS | 1229745 | 1230830 |              | putative Cytochrome c peroxidase (ccp)                                          |
| Peroxidase                                     | NITFAB_1373  | CDS | 1412079 | 1413359 |              | putative Di-heme cytochrome c peroxidase                                        |
| Peroxidase                                     | NITFAB_1903  | CDS | 1893290 | 1894333 | <i>ccpA</i>  | Cytochrome c551 peroxidase                                                      |
| Phosphate Transport                            | NITFAB_0743  | CDS | 765491  | 766264  | <i>pstB1</i> | phosphate transporter subunit; ATP-binding component of ABC superfamily         |
| Phosphate Transport                            | NITFAB_0744  | CDS | 766277  | 767122  | <i>pstA1</i> | phosphate transporter subunit; membrane component of ABC superfamily            |
| Phosphate Transport                            | NITFAB_0745  | CDS | 767125  | 768087  | <i>pstC1</i> | phosphate transporter subunit; membrane component of ABC superfamily            |
| Phosphate Transport                            | NITFAB_0746  | CDS | 768211  | 769260  | <i>pstS1</i> | phosphate transporter subunit; periplasmic-binding component of ABC superfamily |
| Phosphate Transport                            | NITFAB_0967  | CDS | 1005708 | 1006757 | <i>pstS2</i> | phosphate transporter subunit; periplasmic-binding component of ABC superfamily |
| Phosphate Transport                            | NITFAB_1051  | CDS | 1080264 | 1081037 | <i>pstB2</i> | high-affinity phosphate transport protein (ABC superfamily, atp_bind)           |
| Phosphate Transport                            | NITFAB_1052  | CDS | 1081050 | 1081895 | <i>pstA2</i> | phosphate transporter subunit; membrane component of ABC superfamily            |
| Phosphate Transport                            | NITFAB_1053  | CDS | 1081898 | 1082860 | <i>pstC2</i> | phosphate transporter subunit; membrane component of ABC superfamily            |
| Phosphate Transport                            | NITFAB_1054  | CDS | 1082984 | 1084033 | <i>pstS3</i> | phosphate transporter subunit; periplasmic-binding component of ABC superfamily |
| Phosphate Transport                            | NITFAB_2482  | CDS | 2496355 | 2497062 | <i>phoU</i>  | negative regulator of PhoR/PhoB two-component regulator                         |
| Potassium Transport                            | NITFAB_1894  | CDS | 1881154 | 1883025 | <i>kup</i>   | potassium transporter                                                           |
| Quarternary Ammonium Compound resistance       | NITFAB_1750  | CDS | 1754843 | 1755163 | <i>sugE</i>  | Quaternary ammonium compound-resistance protein SugE                            |
| Quarternary Ammonium Compound resistance       | NITFAB_p0005 | CDS | 3780    | 4112    | <i>emrE</i>  | Quaternary ammonium compound-resistance protein EmrE                            |
| Quorum Sensing                                 | NITFAB_1168  | CDS | 1181820 | 1182377 | <i>anoI</i>  | Acyl-homoserine-lactone synthase                                                |
| Quorum Sensing                                 | NITFAB_2191  | CDS | 2206256 | 2206843 | <i>anoI</i>  | Acyl-homoserine-lactone synthase                                                |
| Quorum Sensing                                 | NITFAB_2193  | CDS | 2207440 | 2208222 | <i>anoR</i>  | Transcriptional activator protein AnoR                                          |
| RND family Heavy metal/cation/multidrug Efflux | NITFAB_0193  | CDS | 179386  | 180711  |              | putative Cation efflux system, membrane fusion protein                          |
| RND family Heavy metal/cation/multidrug Efflux | NITFAB_0194  | CDS | 180708  | 183818  | <i>cusA</i>  | Cation efflux system protein CusA                                               |
| RND family Heavy metal/cation/multidrug Efflux | NITFAB_0537  | CDS | 535178  | 536479  |              | putative Outer membrane efflux protein, cusC-like                               |
| RND family Heavy metal/cation/multidrug Efflux | NITFAB_0538  | CDS | 536476  | 537627  |              | putative Efflux transporter, RND family, MFP subunit                            |
| RND family Heavy metal/cation/multidrug Efflux | NITFAB_0539  | CDS | 537629  | 540727  | <i>cusA2</i> | Cation efflux system protein                                                    |
| RND family Heavy metal/cation/multidrug Efflux | NITFAB_1570  | CDS | 1604686 | 1607775 |              | putative Cation efflux system protein CzcA                                      |

|                                                |             |     |         |         |              |                                                                                                  |
|------------------------------------------------|-------------|-----|---------|---------|--------------|--------------------------------------------------------------------------------------------------|
| RND family Heavy metal/cation/multidrug Efflux | NITFAB_1571 | CDS | 1607785 | 1609026 |              | putative Efflux transporter, RND family, MFP subunit                                             |
| RND family Heavy metal/cation/multidrug Efflux | NITFAB_1572 | CDS | 1609028 | 1610380 |              | putative Outer membrane efflux protein                                                           |
| RND family Heavy metal/cation/multidrug Efflux | NITFAB_1586 | CDS | 1618626 | 1621790 | <i>cusA3</i> | copper/silver efflux system, membrane component                                                  |
| RND family Heavy metal/cation/multidrug Efflux | NITFAB_1587 | CDS | 1621787 | 1623397 |              | putative Cation efflux system protein CusB                                                       |
| RND family Heavy metal/cation/multidrug Efflux | NITFAB_1588 | CDS | 1623394 | 1624737 |              | putative outer membrane silver resistance, three components proton antiporter efflux system SilC |
| RND family Heavy metal/cation/multidrug Efflux | NITFAB_1602 | CDS | 1631892 | 1633019 |              | putative RND efflux pump, membrane fusion protein, similar to AcrA family                        |
| RND family Heavy metal/cation/multidrug Efflux | NITFAB_1603 | CDS | 1633016 | 1636099 |              | putative RND efflux pump, similar to multidrug efflux transporter AcrB                           |
| RND family Heavy metal/cation/multidrug Efflux | NITFAB_1757 | CDS | 1760980 | 1764081 |              | putative Heavy metal efflux pump                                                                 |
| RND family Heavy metal/cation/multidrug Efflux | NITFAB_1864 | CDS | 1847929 | 1848708 |              | putative Zinc transporter                                                                        |
| RND family Heavy metal/cation/multidrug Efflux | NITFAB_1968 | CDS | 1964135 | 1965367 | <i>mdtA</i>  | multidrug efflux system, subunit A                                                               |
| RND family Heavy metal/cation/multidrug Efflux | NITFAB_1969 | CDS | 1965364 | 1968453 | <i>mdtB</i>  | multidrug efflux system, subunit B                                                               |
| RND family Heavy metal/cation/multidrug Efflux | NITFAB_1970 | CDS | 1968476 | 1971583 | <i>mdtC</i>  | multidrug efflux system, subunit C                                                               |
| RND family Heavy metal/cation/multidrug Efflux | NITFAB_2005 | CDS | 2010740 | 2012266 |              | putative RND efflux system, outer membrane lipoprotein, NodT family                              |
| RND family Heavy metal/cation/multidrug Efflux | NITFAB_2006 | CDS | 2012244 | 2015381 | <i>acrB</i>  | multidrug efflux system protein                                                                  |
| RND family Heavy metal/cation/multidrug Efflux | NITFAB_2007 | CDS | 2015390 | 2016550 | <i>acrE</i>  | RND efflux pump, membrane fusion protein                                                         |
| Sec Pathway                                    | NITFAB_0271 | CDS | 265750  | 268467  | <i>secA</i>  | Preprotein translocase subunit SecA, ATPase                                                      |
| Sec Pathway                                    | NITFAB_0463 | CDS | 471358  | 471702  | <i>secE</i>  | Preprotein translocase, subunit SecE                                                             |
| Sec Pathway                                    | NITFAB_0497 | CDS | 497006  | 498337  | <i>secY</i>  | Preprotein translocase, membrane subunit SecY                                                    |
| Sec Pathway                                    | NITFAB_0943 | CDS | 984982  | 985785  | <i>lepB</i>  | leader peptidase (signal peptidase I)                                                            |
| Sec Pathway                                    | NITFAB_1106 | CDS | 1141882 | 1142232 | <i>secG</i>  | Preprotein translocase, membrane subunit SecG                                                    |
| Sec Pathway                                    | NITFAB_1253 | CDS | 1275506 | 1275961 | <i>lspA</i>  | prolipoprotein signal peptidase (signal peptidase II)                                            |
| Sec Pathway                                    | NITFAB_1761 | CDS | 1768203 | 1769132 | <i>secF</i>  | Protein-export membrane protein SecF                                                             |
| Sec Pathway                                    | NITFAB_1762 | CDS | 1769168 | 1770979 | <i>secD</i>  | Protein-export membrane protein SecD                                                             |
| Sec Pathway                                    | NITFAB_1763 | CDS | 1770989 | 1771312 | <i>yajC</i>  | Preprotein translocase, subunit YajC                                                             |
| Sec Pathway                                    | NITFAB_2081 | CDS | 2093522 | 2094580 | <i>ftsY</i>  | Signal recognition particle receptor FtsY                                                        |
| Sec Pathway                                    | NITFAB_2288 | CDS | 2300518 | 2300997 | <i>secB</i>  | protein export chaperone                                                                         |
| Sec Pathway                                    | NITFAB_2354 | CDS | 2356946 | 2358298 | <i>ffh</i>   | Signal Recognition Particle (SRP) component with 4.5S RNA (ffs)                                  |

|                            |              |             |              |            |             |                                                                                                                 |
|----------------------------|--------------|-------------|--------------|------------|-------------|-----------------------------------------------------------------------------------------------------------------|
| Superoxide dismutase       | NITFAB_0901  | CDS         | 937741       | 938319     | <i>sodB</i> | superoxide dismutase (Fe)                                                                                       |
| Superoxide dismutase       | NITFAB_1655  | CDS         | 1670177      | 1670785    |             | putative superoxide dismutase (copper/zinc)                                                                     |
| TAT secretion              | NITFAB_2544  | CDS         | 2555372      | 2556127    | <i>tatC</i> | Sec-independent protein translocase protein TatC                                                                |
| TAT secretion              | NITFAB_2545  | CDS         | 2556127      | 2556855    |             | putative Sec-independent protein translocase protein TatB                                                       |
| TAT secretion              | NITFAB_2546  | CDS         | 2556871      | 2557101    | <i>tatA</i> | Sec-independent protein translocase protein TatA                                                                |
| Toluene transport (export) | NITFAB_0135  | CDS         | 119077       | 119886     | <i>yrbF</i> | toluene transporter subunit: ATP-binding component of ABC superfamily                                           |
| Toluene transport (export) | NITFAB_0136  | CDS         | 119877       | 120671     | <i>yrbE</i> | toluene transporter subunit: membrane component of ABC superfamily                                              |
| Toluene transport (export) | NITFAB_0137  | CDS         | 120674       | 121135     | <i>yrbD</i> | toluene transporter subunit: membrane component of ABC superfamily                                              |
| Toluene transport (export) | NITFAB_0138  | CDS         | 121167       | 121808     |             | putative ABC-type toluene transporter, auxiliary component                                                      |
| Toluene transport (export) | NITFAB_0140  | CDS         | 122124       | 123029     | <i>yadG</i> | putative transporter subunit: ATP-binding component of ABC superfamily                                          |
| Toluene transport (export) | NITFAB_0141  | CDS         | 123037       | 123792     |             | putative transporter subunit: membrane component of ABC superfamily                                             |
| Ubiquinone Synthesis       | NITFAB_0124  | CDS         | 108342       | 109499     | <i>ubiF</i> | Ubiquinone biosynthesis hydroxylase, UbiH/UbiF/VisC/COQ6 family                                                 |
| Ubiquinone Synthesis       | NITFAB_0128  | CDS         | 112688       | 114151     | <i>ubiD</i> | 3-octaprenyl-4-hydroxybenzoate decarboxylase                                                                    |
| Ubiquinone Synthesis       | NITFAB_0233  | CDS         | 225742       | 226899     | <i>ubiH</i> | 2-octaprenyl-6-methoxyphenol hydroxylase, FAD/NAD(P)-binding                                                    |
| Ubiquinone Synthesis       | NITFAB_0325  | CDS         | 326861       | 327718     | <i>ubiA</i> | p-hydroxybenzoate octaprenyltransferase                                                                         |
| Ubiquinone Synthesis       | NITFAB_0326  | CDS         | 327715       | 328335     | <i>ubiC</i> | putative chorismate pyruvate-lyase ubiC                                                                         |
| Ubiquinone Synthesis       | NITFAB_0412  | CDS         | 419530       | 421050     | <i>ubiB</i> | 2-octaprenylphenol hydroxylase                                                                                  |
| Ubiquinone Synthesis       | NITFAB_0415  | CDS         | 422717       | 423451     | <i>ubiE</i> | bifunctional 2-octaprenyl-6-methoxy-1,4-benzoquinone methylase and S-adenosylmethionine:2-DMK methyltransferase |
| Ubiquinone Synthesis       | NITFAB_0626  | CDS         | 619536       | 620231     | <i>ubiG</i> | 3-demethylubiquinone-9 3-O-methyltransferase and 2-octaprenyl-6-hydroxy phenol methylase                        |
| <b>Nitrogen Metabolism</b> |              |             |              |            |             |                                                                                                                 |
| <b>Pathway</b>             | <b>Label</b> | <b>Type</b> | <b>Begin</b> | <b>End</b> | <b>Gene</b> | <b>Product</b>                                                                                                  |
| Ammonium Transporter       | NITFAB_1755  | CDS         | 1758819      | 1760042    |             | putative Ammonium transporter                                                                                   |
| Nitrite Assimilation       | NITFAB_1038  | CDS         | 1067122      | 1069557    | <i>nasD</i> | Assimilatory Nitrite reductase, NAD(P)H dependent, large subunit                                                |
| Nitrite Assimilation       | NITFAB_1039  | CDS         | 1069570      | 1069893    | <i>nasE</i> | Assimilatory Nitrite reductase, NAD(P)H dependent, small subunit                                                |
| Nitrite Oxidation          | NITFAB_2341  | CDS         | 2341774      | 2342514    |             | putative nitrite oxidoreductase assembly chaperone protein                                                      |
| Nitrite Oxidation          | NITFAB_2342  | CDS         | 2342583      | 2343692    |             | putative nitrite oxidoreductase, gamma subunit                                                                  |
| Nitrite Oxidation          | NITFAB_2343  | CDS         | 2343703      | 2344860    | <i>nxB1</i> | Nitrite oxidoreductase, beta subunit                                                                            |
| Nitrite Oxidation          | NITFAB_2344  | CDS         | 2344941      | 2348450    | <i>nxA1</i> | Nitrite oxidoreductase, alpha subunit                                                                           |
| Nitrite Oxidation          | NITFAB_2593  | CDS         | 2594871      | 2595611    |             | putative nitrite oxidoreductase assembly chaperone protein                                                      |
| Nitrite Oxidation          | NITFAB_2594  | CDS         | 2595680      | 2596789    |             | putative nitrite oxidoreductase, gamma subunit                                                                  |
| Nitrite Oxidation          | NITFAB_2595  | CDS         | 2596800      | 2597957    | <i>nxB2</i> | Nitrite oxidoreductase, beta subunit                                                                            |
| Nitrite Oxidation          | NITFAB_2596  | CDS         | 2598038      | 2601547    | <i>nxA2</i> | Nitrite oxidoreductase, alpha subunit                                                                           |
| Nitrite Reduction          | NITFAB_0189  | CDS         | 176679       | 177623     | <i>nirK</i> | Copper-containing nitrite reductase (NO-forming)                                                                |
| Nitrite Transporter        | NITFAB_1230  | CDS         | 1246759      | 1247571    |             | putative Formate/nitrite transporter                                                                            |
| <b>Respiratory Chain</b>   |              |             |              |            |             |                                                                                                                 |
| <b>Pathway</b>             | <b>Label</b> | <b>Type</b> | <b>Begin</b> | <b>End</b> | <b>Gene</b> | <b>Product</b>                                                                                                  |

|                                 |              |     |         |         |             |                                                                                                                   |
|---------------------------------|--------------|-----|---------|---------|-------------|-------------------------------------------------------------------------------------------------------------------|
| Alternative Complex III (ACIII) | NITFAB_0001  | CDS | 356     | 2566    |             | putative Menaquinol oxidoreductase complex ACIII, molybdopterin-binding subunit ActB1                             |
| Alternative Complex III (ACIII) | NITFAB_0002  | CDS | 2610    | 3215    |             | putative Menaquinol oxidoreductase complex ACIII, cytochrome c subunit ActA                                       |
| Alternative Complex III (ACIII) | NITFAB_2604  | CDS | 2605395 | 2606408 |             | putative Menaquinol oxidoreductase complex ACIII, membrane subunit ActF                                           |
| Alternative Complex III (ACIII) | NITFAB_2605  | CDS | 2606422 | 2606961 |             | putative Menaquinol oxidoreductase complex ACIII, monohaem cytochrome c subunit ActE                              |
| Alternative Complex III (ACIII) | NITFAB_2606  | CDS | 2606958 | 2607485 |             | putative Menaquinol oxidoreductase complex ACIII, DUF3341 subunit ActD                                            |
| Alternative Complex III (ACIII) | NITFAB_2607  | CDS | 2607485 | 2608849 |             | putative Menaquinol oxidoreductase complex ACIII, menaquinol-binding membrane protein subunit ActC                |
| Alternative Complex III (ACIII) | NITFAB_2608  | CDS | 2608924 | 2609424 |             | putative Menaquinol oxidoreductase complex ACIII, iron-sulfur cluster-binding subunit ActB2 (C-terminal fragment) |
| Alternative Complex III (ACIII) | NITFAB_CDS2R | CDS | 2       | 262     |             | putative Menaquinol oxidoreductase complex ACIII, iron-sulfur cluster-binding subunit ActB2 (N-terminal fragment) |
| Complex I                       | NITFAB_1772  | CDS | 1777637 | 1779088 | <i>nuoN</i> | NADH-quinone oxidoreductase subunit N                                                                             |
| Complex I                       | NITFAB_1773  | CDS | 1779111 | 1780595 | <i>nuoM</i> | NADH-quinone oxidoreductase subunit M                                                                             |
| Complex I                       | NITFAB_1774  | CDS | 1780626 | 1782647 | <i>nuoL</i> | NADH-quinone oxidoreductase subunit L                                                                             |
| Complex I                       | NITFAB_1775  | CDS | 1782654 | 1782965 | <i>nuoK</i> | NADH-quinone oxidoreductase subunit K                                                                             |
| Complex I                       | NITFAB_1776  | CDS | 1783114 | 1783734 | <i>nuoJ</i> | NADH-quinone oxidoreductase subunit J                                                                             |
| Complex I                       | NITFAB_1777  | CDS | 1783902 | 1784390 | <i>nuoI</i> | NADH-quinone oxidoreductase subunit I                                                                             |
| Complex I                       | NITFAB_1778  | CDS | 1784410 | 1785450 | <i>nuoH</i> | NADH:ubiquinone oxidoreductase, subunit H                                                                         |
| Complex I                       | NITFAB_1779  | CDS | 1785447 | 1787825 | <i>nuoG</i> | NADH-quinone oxidoreductase, subunit G                                                                            |
| Complex I                       | NITFAB_1780  | CDS | 1787840 | 1789111 | <i>nuoF</i> | NADH:ubiquinone oxidoreductase, subunit F                                                                         |
| Complex I                       | NITFAB_1781  | CDS | 1789108 | 1789587 | <i>nuoE</i> | NADH-quinone oxidoreductase, subunit E                                                                            |
| Complex I                       | NITFAB_1782  | CDS | 1789695 | 1790948 | <i>nuoD</i> | NADH-quinone oxidoreductase subunit D                                                                             |
| Complex I                       | NITFAB_1783  | CDS | 1791054 | 1791695 | <i>nuoC</i> | NADH-quinone oxidoreductase subunit C                                                                             |
| Complex I                       | NITFAB_1784  | CDS | 1791751 | 1792227 | <i>nuoB</i> | NADH-quinone oxidoreductase subunit B                                                                             |
| Complex I                       | NITFAB_1785  | CDS | 1792218 | 1792574 | <i>nuoA</i> | NADH-quinone oxidoreductase subunit A                                                                             |
| Complex II                      | NITFAB_0684  | CDS | 698060  | 698434  | <i>sdhC</i> | Succinate dehydrogenase, cytochrome b556 subunit                                                                  |
| Complex II                      | NITFAB_0685  | CDS | 698428  | 698802  | <i>sdhD</i> | Succinate dehydrogenase, hydrophobic membrane anchor protein                                                      |
| Complex II                      | NITFAB_0686  | CDS | 698802  | 700565  | <i>sdhA</i> | Succinate dehydrogenase, flavoprotein subunit                                                                     |
| Complex II                      | NITFAB_0687  | CDS | 700925  | 701620  | <i>sdhB</i> | Succinate dehydrogenase, iron-sulfur subunit                                                                      |
| Complex IV                      | NITFAB_0046  | CDS | 42673   | 43638   | <i>ccoO</i> | Cbb3-type cytochrome oxidase, cytochrome c subunit                                                                |
| Complex IV                      | NITFAB_0047  | CDS | 43674   | 45083   | <i>ccoN</i> | Cbb3-type cytochrome oxidase, subunit I                                                                           |
| Complex IV                      | NITFAB_0056  | CDS | 49317   | 49829   |             | putative Cbb3-type cytochrome oxidase-like protein                                                                |
| Complex V                       | NITFAB_0146  | CDS | 128827  | 129255  | <i>atpC</i> | F1 sector of membrane-bound ATP synthase, epsilon subunit                                                         |
| Complex V                       | NITFAB_0147  | CDS | 129304  | 130725  | <i>atpD</i> | F1 sector of membrane-bound ATP synthase, beta subunit                                                            |
| Complex V                       | NITFAB_0148  | CDS | 130927  | 131796  | <i>atpG</i> | F1 sector of membrane-bound ATP synthase, gamma subunit                                                           |
| Complex V                       | NITFAB_0149  | CDS | 131812  | 133353  | <i>atpA</i> | F1 sector of membrane-bound ATP synthase, alpha subunit                                                           |
| Complex V                       | NITFAB_0150  | CDS | 133385  | 133918  | <i>atpH</i> | F1 sector of membrane-bound ATP synthase, delta subunit                                                           |

|                |                   |             |              |            |             |                                                     |
|----------------|-------------------|-------------|--------------|------------|-------------|-----------------------------------------------------|
| Complex V      | NITFAB_0151       | CDS         | 133924       | 134394     | <i>atpF</i> | F0 sector of membrane-bound ATP synthase, subunit b |
| Complex V      | NITFAB_0152       | CDS         | 134429       | 134671     | <i>atpE</i> | F0 sector of membrane-bound ATP synthase, subunit c |
| Complex V      | NITFAB_0153       | CDS         | 134730       | 135590     | <i>atpB</i> | F0 sector of membrane-bound ATP synthase, subunit a |
| Complex V      | NITFAB_0154       | CDS         | 135587       | 135952     |             | putative ATP synthase, subunit I                    |
| <b>RNAs</b>    |                   |             |              |            |             |                                                     |
| <b>Pathway</b> | <b>Label</b>      | <b>Type</b> | <b>Begin</b> | <b>End</b> | <b>Gene</b> | <b>Product</b>                                      |
| rRNA           | NITFAB_16s_rRNA_1 | rRNA        | 2414812      | 2416339    |             | ribosomal RNA, 16s rRNA                             |
| rRNA           | NITFAB_16s_rRNA_2 | rRNA        | 2002980      | 2004507    |             | ribosomal RNA, 16s rRNA                             |
| rRNA           | NITFAB_23s_rRNA_1 | rRNA        | 2411340      | 2414224    |             | ribosomal RNA, 23s rRNA                             |
| rRNA           | NITFAB_23s_rRNA_2 | rRNA        | 1999508      | 2002392    |             | ribosomal RNA, 23s rRNA                             |
| rRNA           | NITFAB_5s_rRNA_1  | rRNA        | 2411105      | 2411216    |             | ribosomal RNA, 5s rRNA                              |
| rRNA           | NITFAB_5s_rRNA_2  | rRNA        | 1999273      | 1999384    |             | ribosomal RNA, 5s rRNA                              |
| tRNA           | NITFAB_tmRNA6     | tmRNA       | 1843652      | 1844020    |             | tmRNA                                               |
| tRNA           | NITFAB_tRNA1      | tRNA        | 51890        | 51966      |             | Arg tRNA                                            |
| tRNA           | NITFAB_tRNA10     | tRNA        | 602524       | 602600     |             | Met tRNA                                            |
| tRNA           | NITFAB_tRNA11     | tRNA        | 709368       | 709452     |             | Leu tRNA                                            |
| tRNA           | NITFAB_tRNA12     | tRNA        | 715552       | 715627     |             | Val tRNA                                            |
| tRNA           | NITFAB_tRNA13     | tRNA        | 715639       | 715715     |             | Asp tRNA                                            |
| tRNA           | NITFAB_tRNA14     | tRNA        | 791095       | 791170     |             | Arg tRNA                                            |
| tRNA           | NITFAB_tRNA15     | tRNA        | 946270       | 946359     |             | Ser tRNA                                            |
| tRNA           | NITFAB_tRNA16     | tRNA        | 1142253      | 1142337    |             | Leu tRNA                                            |
| tRNA           | NITFAB_tRNA17     | tRNA        | 1331693      | 1331785    |             | Ser tRNA                                            |
| tRNA           | NITFAB_tRNA18     | tRNA        | 1331812      | 1331888    |             | Arg tRNA                                            |
| tRNA           | NITFAB_tRNA19     | tRNA        | 1448189      | 1448264    |             | Gly tRNA                                            |
| tRNA           | NITFAB_tRNA2      | tRNA        | 375633       | 375708     |             | Phe tRNA                                            |
| tRNA           | NITFAB_tRNA20     | tRNA        | 1448322      | 1448395    |             | Cys tRNA                                            |
| tRNA           | NITFAB_tRNA21     | tRNA        | 1448457      | 1448533    |             | Pro tRNA                                            |
| tRNA           | NITFAB_tRNA22     | tRNA        | 1491971      | 1492046    |             | Lys tRNA                                            |
| tRNA           | NITFAB_tRNA23     | tRNA        | 1740015      | 1740103    |             | Leu tRNA                                            |
| tRNA           | NITFAB_tRNA24     | tRNA        | 1753309      | 1753393    |             | Leu tRNA                                            |
| tRNA           | NITFAB_tRNA25     | tRNA        | 1912389      | 1912464    |             | Ala tRNA                                            |
| tRNA           | NITFAB_tRNA26     | tRNA        | 1912488      | 1912563    |             | Glu tRNA                                            |
| tRNA           | NITFAB_tRNA27     | tRNA        | 2589815      | 2589890    |             | Thr tRNA                                            |

|                          |               |             |              |            |              |                                                                               |
|--------------------------|---------------|-------------|--------------|------------|--------------|-------------------------------------------------------------------------------|
| tRNA                     | NITFAB tRNA28 | tRNA        | 2414608      | 2414684    |              | Ile tRNA                                                                      |
| tRNA                     | NITFAB tRNA29 | tRNA        | 2414527      | 2414602    |              | Ala tRNA                                                                      |
| tRNA                     | NITFAB tRNA3  | tRNA        | 469563       | 469647     |              | Tyr tRNA                                                                      |
| tRNA                     | NITFAB tRNA30 | tRNA        | 2410795      | 2410881    |              | Leu tRNA                                                                      |
| tRNA                     | NITFAB tRNA31 | tRNA        | 2279241      | 2279332    |              | Ser tRNA                                                                      |
| tRNA                     | NITFAB tRNA32 | tRNA        | 2119279      | 2119369    |              | Ser tRNA                                                                      |
| tRNA                     | NITFAB tRNA33 | tRNA        | 2004741      | 2004817    |              | Met tRNA                                                                      |
| tRNA                     | NITFAB tRNA34 | tRNA        | 2002776      | 2002852    |              | Ile tRNA                                                                      |
| tRNA                     | NITFAB tRNA35 | tRNA        | 2002695      | 2002770    |              | Ala tRNA                                                                      |
| tRNA                     | NITFAB tRNA36 | tRNA        | 1910664      | 1910740    |              | Val tRNA                                                                      |
| tRNA                     | NITFAB tRNA37 | tRNA        | 1663771      | 1663847    |              | Pro tRNA                                                                      |
| tRNA                     | NITFAB tRNA38 | tRNA        | 1578123      | 1578199    |              | Arg tRNA                                                                      |
| tRNA                     | NITFAB tRNA39 | tRNA        | 1578018      | 1578093    |              | His tRNA                                                                      |
| tRNA                     | NITFAB tRNA4  | tRNA        | 469756       | 469829     |              | Gly tRNA                                                                      |
| tRNA                     | NITFAB tRNA40 | tRNA        | 1125124      | 1125199    |              | Asn tRNA                                                                      |
| tRNA                     | NITFAB tRNA41 | tRNA        | 307277       | 307353     |              | Met tRNA                                                                      |
| tRNA                     | NITFAB tRNA42 | tRNA        | 207082       | 207155     |              | Gly tRNA                                                                      |
| tRNA                     | NITFAB tRNA5  | tRNA        | 469840       | 469914     |              | Thr tRNA                                                                      |
| tRNA                     | NITFAB tRNA6  | tRNA        | 471249       | 471324     |              | Trp tRNA                                                                      |
| tRNA                     | NITFAB tRNA7  | tRNA        | 548995       | 549069     |              | Gln tRNA                                                                      |
| tRNA                     | NITFAB tRNA8  | tRNA        | 570123       | 570198     |              | Lys tRNA                                                                      |
| tRNA                     | NITFAB tRNA9  | tRNA        | 570257       | 570332     |              | Thr tRNA                                                                      |
| <b>Sulfur Metabolism</b> |               |             |              |            |              |                                                                               |
| <b>Pathway</b>           | <b>Label</b>  | <b>Type</b> | <b>Begin</b> | <b>End</b> | <b>Gene</b>  | <b>Product</b>                                                                |
| Sulfate Import           | NITFAB_1675   | CDS         | 1693177      | 1694232    | <i>cysA</i>  | sulfate/thiosulfate import ATP-binding protein CysA                           |
| Sulfate Import           | NITFAB_1676   | CDS         | 1694229      | 1695110    | <i>cysW</i>  | sulfate import protein (ABC superfamily, membrane subunit)                    |
| Sulfate Import           | NITFAB_1677   | CDS         | 1695107      | 1695937    | <i>cysT</i>  | sulfate transport protein (ABC superfamily, membrane subunit)                 |
| Sulfate Import           | NITFAB_1685   | CDS         | 1699887      | 1700900    | <i>sbp</i>   | sulfate transporter subunit; periplasmic-binding component of ABC superfamily |
| Sulfur Assimilation      | NITFAB_0850   | CDS         | 880756       | 882501     | <i>sir</i>   | assimilatory sulfite reductase (ferredoxin)                                   |
| Sulfur Assimilation      | NITFAB_0852   | CDS         | 883006       | 883731     | <i>cysH</i>  | adenylsulfate reductase, thioredoxin dependent                                |
| Sulfur Assimilation      | NITFAB_0854   | CDS         | 883841       | 884746     | <i>cysD</i>  | sulfate adenyltransferase, subunit 2                                          |
| Sulfur Assimilation      | NITFAB_0855   | CDS         | 884749       | 886002     | <i>cysN</i>  | sulfate adenyltransferase, subunit 1                                          |
| Sulfur Assimilation      | NITFAB_2037   | CDS         | 2042834      | 2043718    | <i>cysK1</i> | cysteine synthase A, O-acetylserine sulfhydrylase A subunit                   |
| Sulfur Assimilation      | NITFAB_2043   | CDS         | 2047067      | 2047954    | <i>cysM</i>  | cysteine synthase B, O-acetylserine sulfhydrylase B subunit                   |
| Sulfur Assimilation      | NITFAB_2345   | CDS         | 2348995      | 2349924    | <i>cysK2</i> | cysteine synthase A, O-acetylserine sulfhydrylase A subunit                   |
| Sulfite Oxidoreductase   | NITFAB_0978   | CDS         | 1012389      | 1013624    | <i>sorA</i>  | sulfite:cytochrome c oxidoreductase, subunit A                                |
| Sulfite Oxidoreductase   | NITFAB_0979   | CDS         | 1013634      | 1014266    | <i>sorB</i>  | sulfite:cytochrome c oxidoreductase, subunit B                                |
| <b>Prophage</b>          |               |             |              |            |              |                                                                               |

| Pathway                       | Label       | Type | Begin   | End     | Gene | Product                                        |
|-------------------------------|-------------|------|---------|---------|------|------------------------------------------------|
| Predicted functional Prophage | NITFAB_1795 | CDS  | 1796778 | 1798265 |      | protein of unknown function                    |
| Predicted functional Prophage | NITFAB_1796 | CDS  | 1798344 | 1799444 |      | protein of unknown function                    |
| Predicted functional Prophage | NITFAB_1799 | CDS  | 1800230 | 1802245 |      | membrane protein of unknown function           |
| Predicted functional Prophage | NITFAB_1800 | CDS  | 1802289 | 1802540 |      | conserved protein of unknown function          |
| Predicted functional Prophage | NITFAB_1801 | CDS  | 1802609 | 1802917 |      | conserved protein of unknown function          |
| Predicted functional Prophage | NITFAB_1802 | CDS  | 1803010 | 1803666 |      | putative phage tail protein                    |
| Predicted functional Prophage | NITFAB_1806 | CDS  | 1804599 | 1805543 |      | conserved protein of unknown function          |
| Predicted functional Prophage | NITFAB_1807 | CDS  | 1805555 | 1805893 |      | putative Phage-related exported protein        |
| Predicted functional Prophage | NITFAB_1808 | CDS  | 1805895 | 1807187 |      | ClpP class periplasmic serine protease         |
| Predicted functional Prophage | NITFAB_1809 | CDS  | 1807184 | 1808887 |      | Phage portal protein, lambda family            |
| Predicted functional Prophage | NITFAB_1810 | CDS  | 1808841 | 1809068 |      | conserved protein of unknown function          |
| Predicted functional Prophage | NITFAB_1811 | CDS  | 1809206 | 1809511 |      | conserved protein of unknown function          |
| Predicted functional Prophage | NITFAB_1812 | CDS  | 1809504 | 1809791 |      | conserved protein of unknown function          |
| Predicted functional Prophage | NITFAB_1817 | CDS  | 1811974 | 1813905 |      | Phage terminase GpA                            |
| Predicted functional Prophage | NITFAB_1818 | CDS  | 1813871 | 1814251 |      | protein of unknown function                    |
| Predicted functional Prophage | NITFAB_1820 | CDS  | 1814617 | 1815180 |      | protein of unknown function                    |
| Predicted functional Prophage | NITFAB_1824 | CDS  | 1816266 | 1816547 |      | conserved membrane protein of unknown function |

|                               |             |     |         |         |  |                                        |
|-------------------------------|-------------|-----|---------|---------|--|----------------------------------------|
| Predicted functional Prophage | NITFAB_1825 | CDS | 1816544 | 1817140 |  | protein of unknown function            |
| Predicted functional Prophage | NITFAB_1827 | CDS | 1817688 | 1819391 |  | exported protein of unknown function   |
| Predicted functional Prophage | NITFAB_1832 | CDS | 1823121 | 1823621 |  | Uncharacterized endonuclease           |
| Predicted functional Prophage | NITFAB_1835 | CDS | 1824390 | 1825679 |  | DNA modification methylase             |
| Predicted functional Prophage | NITFAB_1838 | CDS | 1826613 | 1826876 |  | conserved protein of unknown function  |
| Predicted functional Prophage | NITFAB_1840 | CDS | 1827241 | 1827798 |  | protein of unknown function            |
| Predicted functional Prophage | NITFAB_1843 | CDS | 1828936 | 1831212 |  | DNA primase/helicase, phage-associated |
| Predicted functional Prophage | NITFAB_1845 | CDS | 1831477 | 1831788 |  | conserved protein of unknown function  |
| Predicted functional Prophage | NITFAB_1846 | CDS | 1832045 | 1832278 |  | conserved protein of unknown function  |
| Predicted functional Prophage | NITFAB_1848 | CDS | 1832959 | 1833237 |  | conserved protein of unknown function  |
